# Supplementary material for: Nickel-embedded zeolite subcrystal catalyst: rapid enhancement of activity and metal impurity resistance in the hydrodesulfurization of 4,6-dimethyldibenzothiophene
Source: Royal Society of Chemistry journal article supplement (doi:10.1039/d4cy00143e), 2024-01-01
Supplement: d4cy00143e1.pdf [file d4cy00143e1.pdf]

**Supporting Information**

**Nickel-embedded zeolite subcrystal catalyst: Rapid enhancement of activity and metal impurity resistance in hydrodesulfurization of 4,6-dimethyldibenzothiophene**

Zhichao Tan<sup>a</sup>, Ke Du<sup>a</sup>, Zhizheng Sheng<sup>a</sup>, Wanyi Li<sup>a</sup>, Huihong Zhu<sup>b</sup>, Lou Gao<sup>a</sup>, He Li<sup>a</sup>, Yi Tang<sup>a</sup>, Yahong Zhang<sup>\*a</sup>

<sup>a</sup> Department of Chemistry, Shanghai Key Laboratory of Molecular Catalysis and Innovative Materials, Collaborative Innovation Center of Chemistry for Energy Materials, Fudan University, Shanghai, China

<sup>b</sup> SINOPEC Dalian Research Institute of Petroleum and Petrochemicals Co., Ltd, 116045 Dalian, China

\* Corresponding author.

Email address: zhangyh@fudan.edu.cn

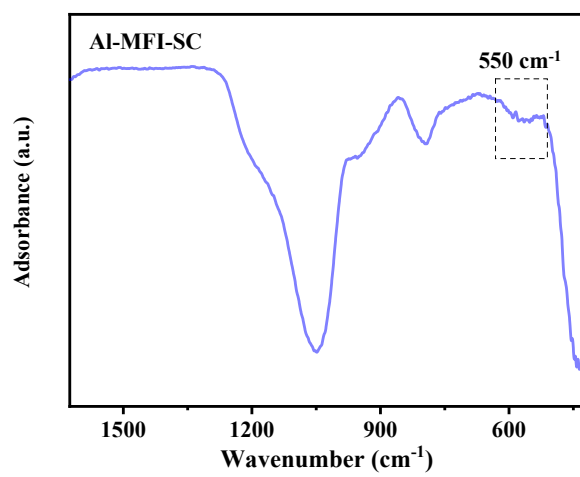

Figure S1 Fourier transform infrared (FT-IR) spectrum of Al-MFI-SC.

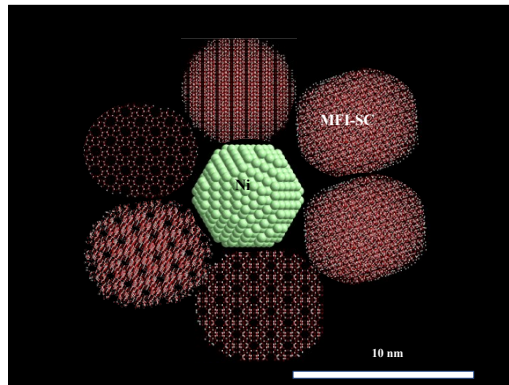

Figure S2 Diagram of Ni embedded in the zeolite subcrystal matrix.

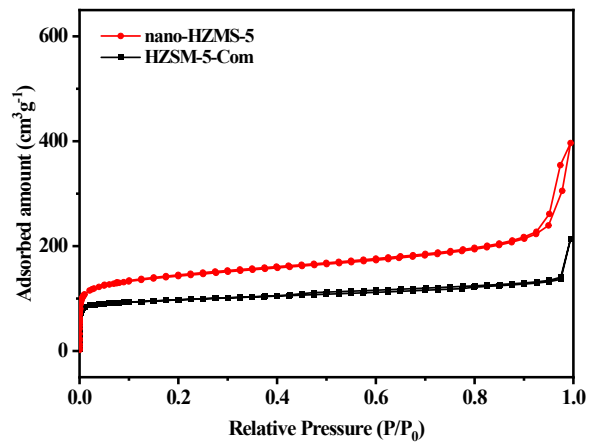

Figure S3 Ar sorption-desorption isotherms of nano-HZSM-5 and HZSM-5-Com.

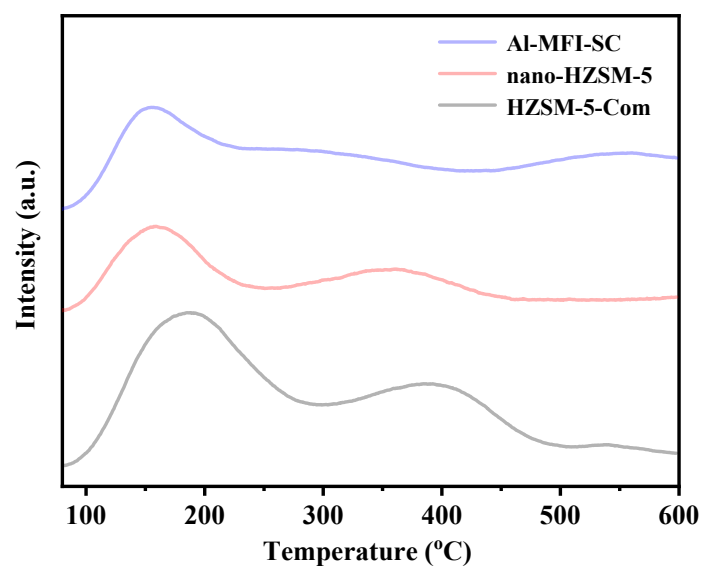

Figure S4 NH<sub>3</sub>-TPD profiles of Al-MFI-SC, nano-HZMS-5, HZSM-5-Com.

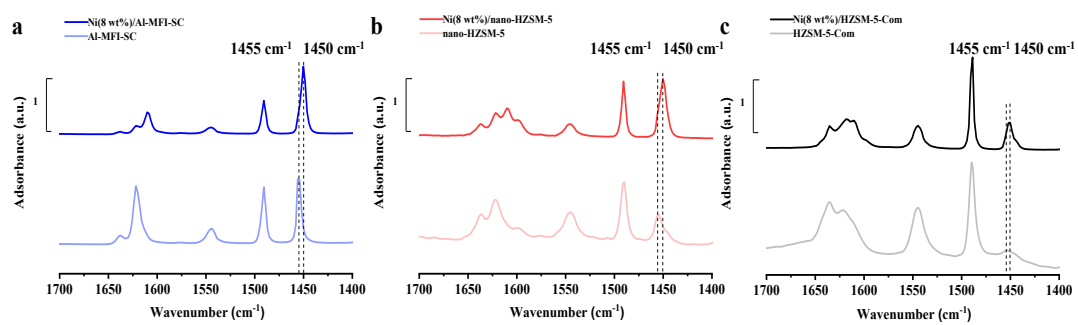

Figure S5 Pyridine adsorbed FT-IR spectra of Al-MFI-SC, Ni(8 wt%)/Al-MFI-SC (a), nano-HZSM-5, Ni(8 wt%)/nano-HZSM-5 (b) and HZSM-5-Com, Ni(8 wt%)/HZSM-5-Com (c) after evacuation at 300 °C.

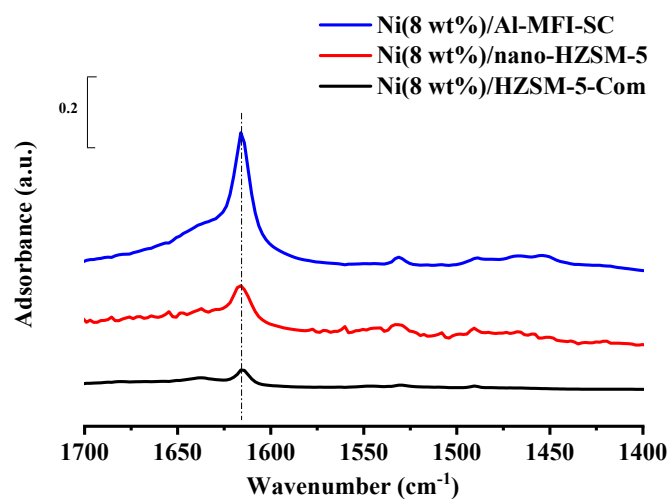

Figure S6 2,6-ditertbutyl-pyridine adsorbed FT-IR spectra of three catalysts after evacuation at 300 °C.

When 2,6-ditertbutyl-pyridine (kinetic diameter: 0.79 nm) is used to probe the accessible surface acid sites of three catalysts, Ni(8 wt%)/Al-MFI-SC shows remarkably higher adsorption of 2,6-ditertbutyl-pyridine (peak around 1615 cm<sup>-1</sup>) than Ni(8 wt%)/nano-HZSM-5 and Ni(8 wt%)/HZSM-5-Com.

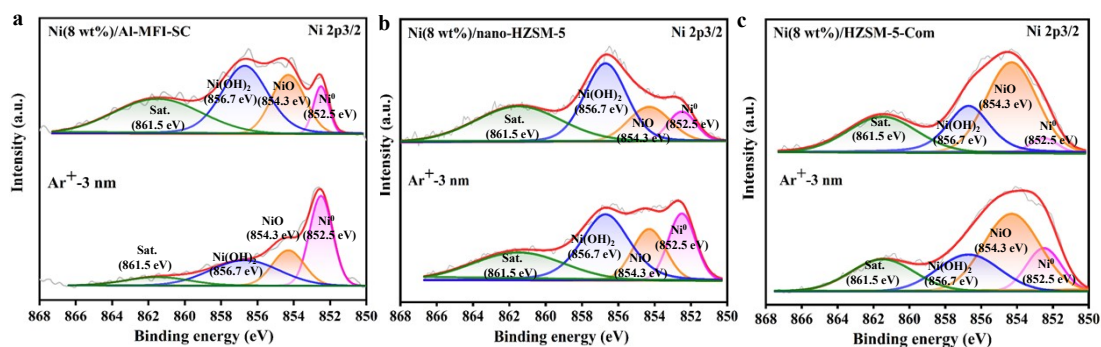

Figure S7 XPS spectra of Ni(8 wt%)/Al-MFI-SC (a), Ni(8 wt%)/nano-HZSM-5 (b) and Ni(8 wt%)/HZSM-5-Com (c) catalysts before and after Ar ion beam.

The comparison of XPS results at different depths using the argon ion beam (removing a depth of 3 nm from the surface) in Figure S7 confirms this observation. Hence, we can conclude that oxidic Ni species derive from the oxidation of Ni<sup>0</sup> in the air. To further clearly express this, the detailed relative amount of different Ni species before and after Ar ion beam was listed in Table S1. Obviously, Ni<sup>0</sup> percentage of three catalysts have increased substantially after Ar ion beam.



Table S1 Relative amounts of different Ni species before and after Ar ion beam of XPS analyses.

| Catalysts            | Relative amount of Ni (%) <sup>a</sup> |                         |                                          |
|----------------------|----------------------------------------|-------------------------|------------------------------------------|
|                      | Ni <sup>0</sup> /Ni <sub>total</sub>   | NiO/Ni <sub>total</sub> | Ni(OH) <sub>2</sub> /Ni <sub>total</sub> |
| Ni(8 wt%)/Al-MFI-SC  | 11.6 (42.0)                            | 31.9 (22.8)             | 56.5 (35.2)                              |
| Ni(8wt%)/nano-HZSM-5 | 14.1 (24.7)                            | 24.7 (23.2)             | 61.2 (52.1)                              |
| Ni(8 wt%)/HZSM-5-Com | 5.4 (18.5)                             | 62.5 (53.5)             | 32.1 (28.0)                              |

<sup>a</sup>The data in parentheses represent XPS analysis results after Ar ion sputtering treatment.

Table S2 TOF of 4,6-DMDBT conversion and desulfurization over three catalysts.

|                       | Conversion (%) | TOF (h <sup>-1</sup> ) | Desulfurization (%) | TOF (h <sup>-1</sup> ) |
|-----------------------|----------------|------------------------|---------------------|------------------------|
| Ni(8 wt%)/Al-MFI-SC   | 27.6           | 1.67                   | 28.8                | 0.87                   |
| Ni(8 wt%)/nano-HZSM-5 | 30.8           | 0.16                   | 28.3                | 0.14                   |
| Ni(8 wt%)/HZSM-5-Com  | 26.6           | 0.13                   | 25.6                | 0.086                  |

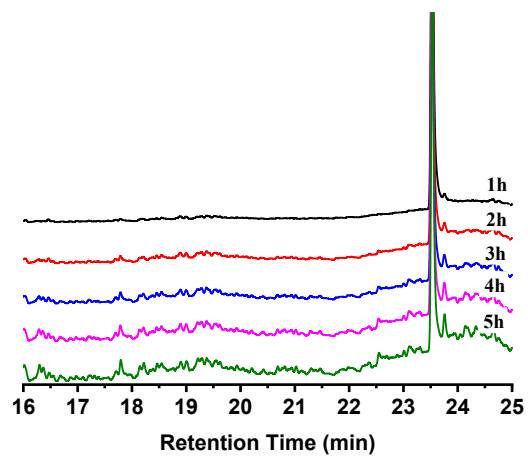

Figure S8 GC spectra of reaction solution catalyzed by Al-MFI-SC at the different reaction time during the conversion of 4,6-DMDBT.

There are not any desulfurization product peaks in GC spectra, and only a spot of isomerization product appears around 23.8 min.

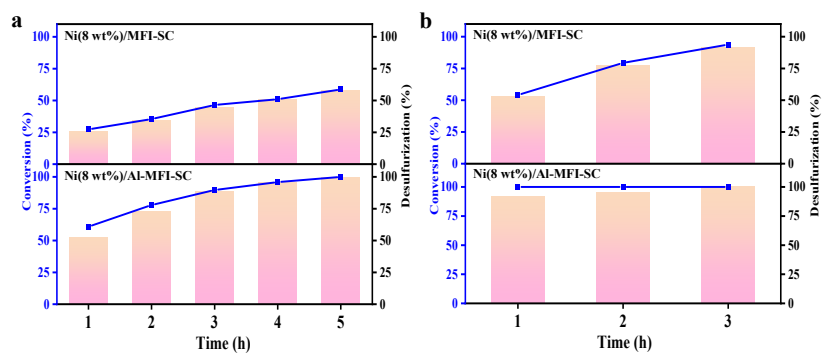

Figure S9 HDS performances of DBT (a) and thiophene (b) on Ni(8 wt%)/MFI-SC and Ni(8 wt%)/Al-MFI-SC catalysts.

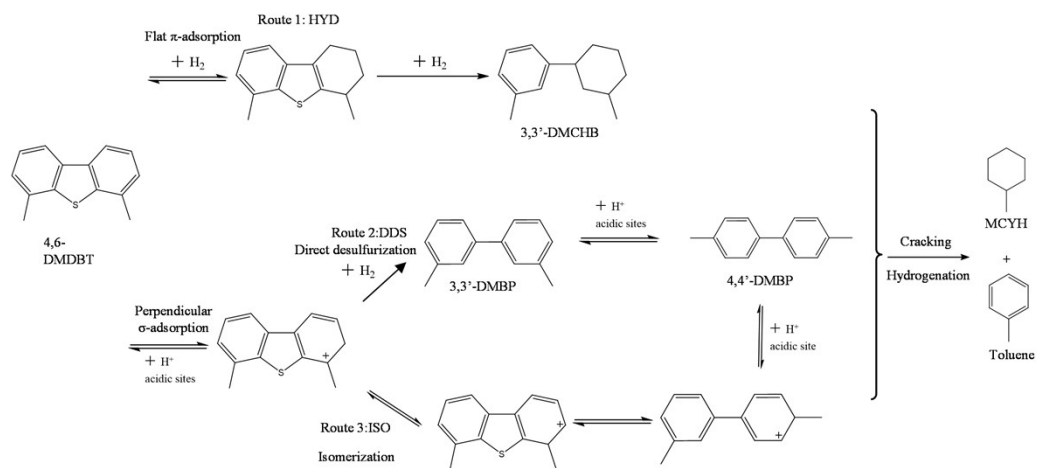

Scheme S1 The conversion routes of 4,6-DMDBT in the presence of Ni/Al-MFI-SC catalyst. Route 1: HYD; Route 2: DDS; Route 3: ISO. 4,6-THDMDBT: 4,6-tetrahydro-dimethyl-dibenzothiophene; 3,3'-DMCHB: 3,3'-dimethyl-cyclohexyl-benzene; 3,3'-DMBCH: 3,3'-dimethyl-bicyclohexyl; 3,3'-DMBP: 3,3'-dimethyl-biphenyl; 4,4'-DMBP: 4,4'-dimethyl-biphenyl.

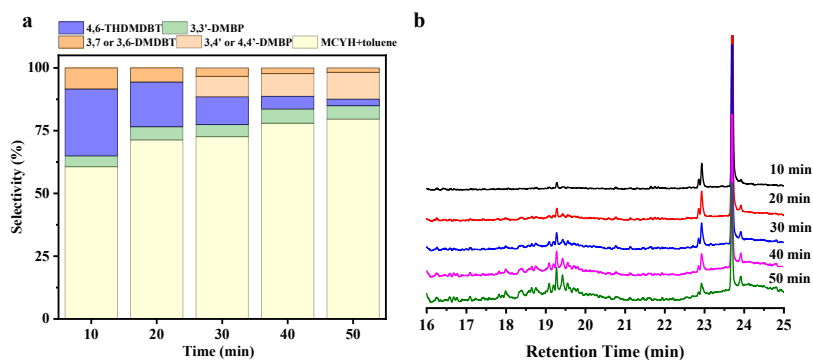

Figure S10 Product selectivity (a) and GC spectra (b) of the reaction solution over Ni(8 wt%)/Al-MFI-SC at the beginning of the 4,6-DMDBT conversion. 4,6-THDMDBT: 4,6-tetrahydro-dimethyl-dibenzothiophene; 3,3'-DMBP: 3,3'-dimethyl-biphenyl; 3,7-DMDBT: 3,7-dimethyl-dibenzothiophene; 3,6-DMDBT: 3,6-dimethyl-dibenzothiophene; 3,4'-DMBP: 3,4'-dimethyl-biphenyl; 4,4'-DMBP: 4,4'-dimethyl-biphenyl; MCYH: methyl-cyclohexane.
